# Supplementary material for: BCG vaccination reduces the mortality of Mycobacterium tuberculosis–infected type 2 diabetes mellitus mice
Source: JCI journal article supplement (doi:10.1172/jci.insight.133788), 2020-03-11
Supplement: sd1 [file 1]

# Supplementary Figures and Tables

Supplementary Figure 1

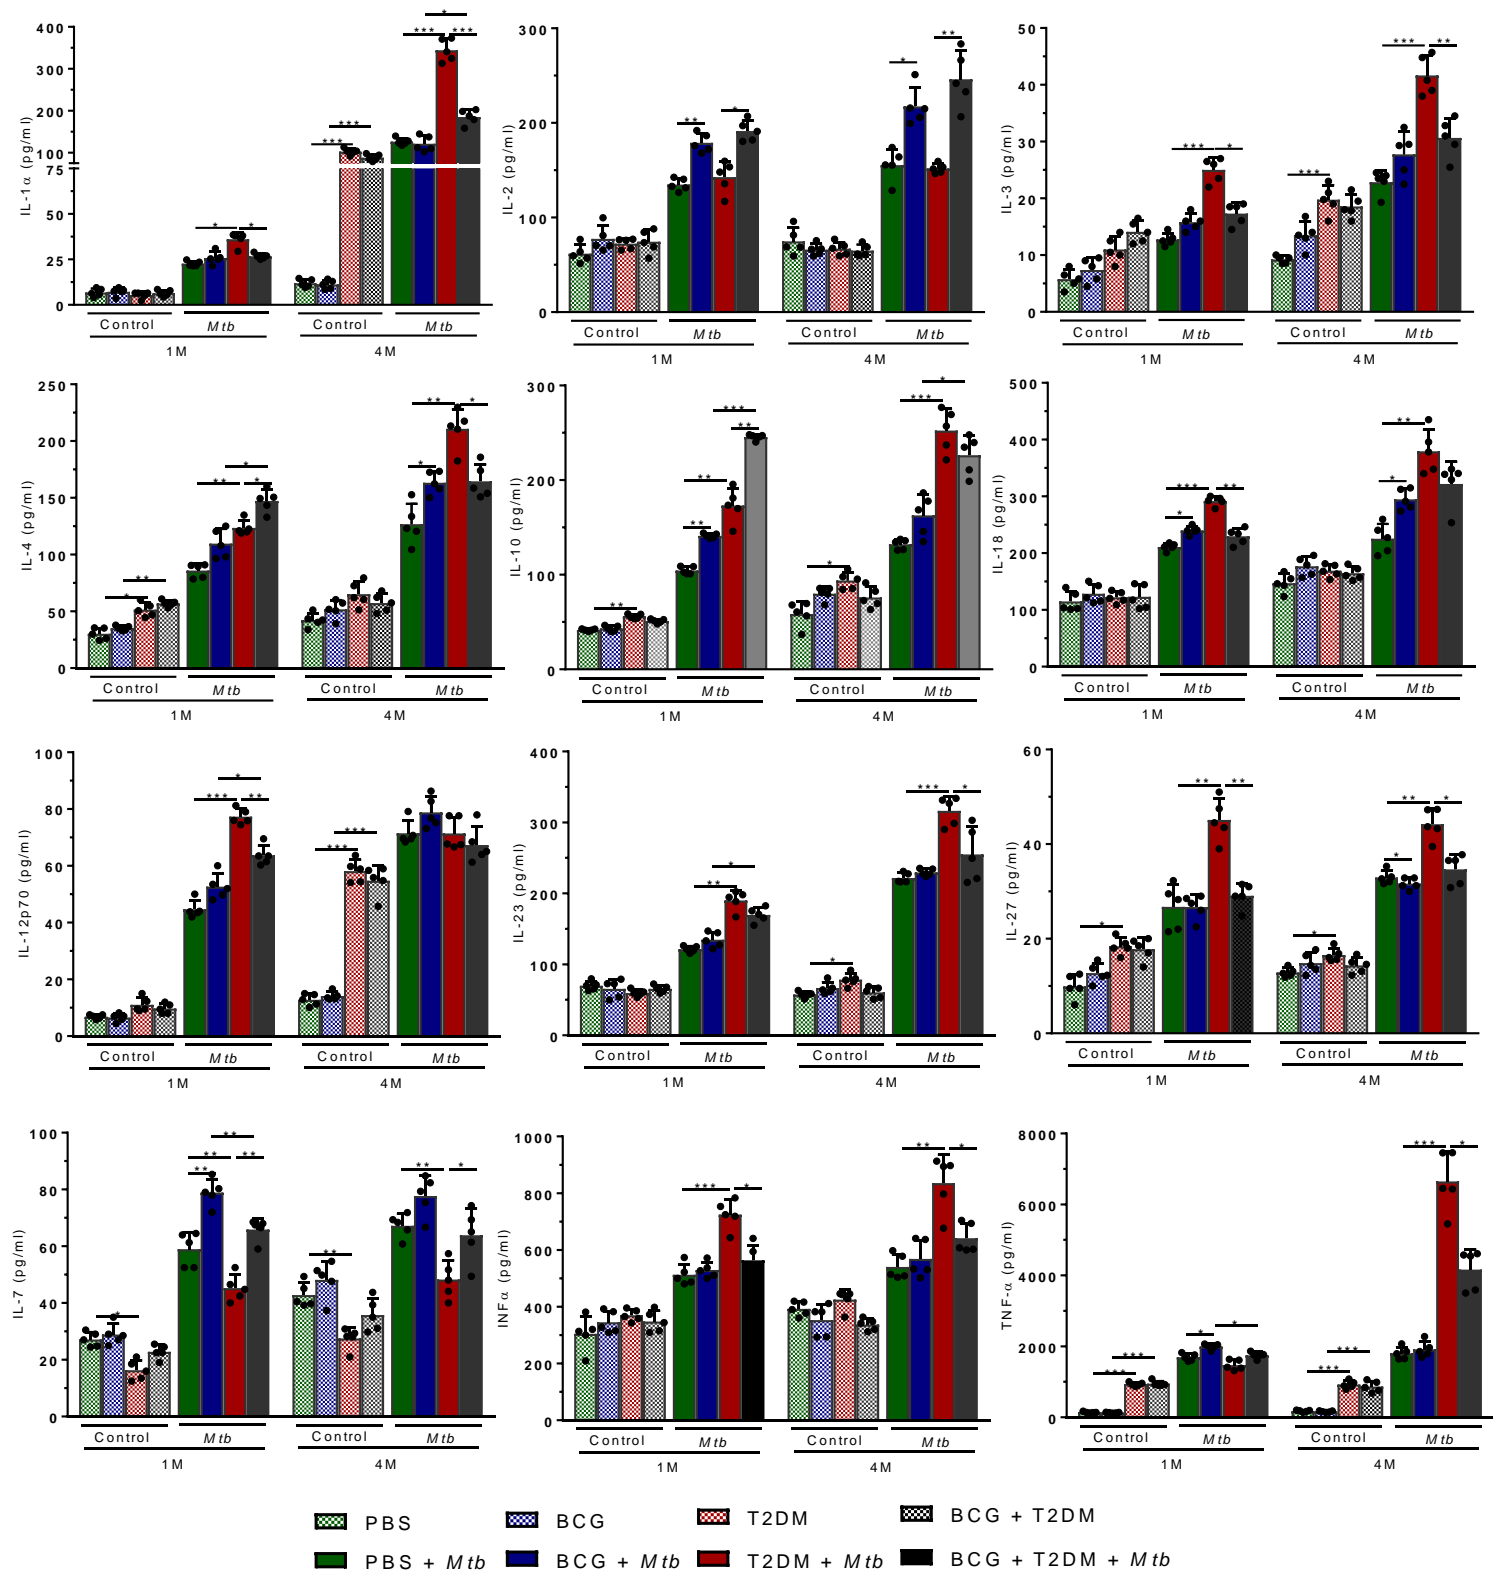

**Supplementary Fig. 1. BCG vaccination alters cytokine levels in T2DM mice infected with *Mtb*.**

PBS control, BCG-vaccinated, T2DM or BCG-vaccinated T2DM mice were infected with ~100 CFU of aerosolized *Mtb* H37Rv. At one and 4 months p.i., lung homogenates from PBS control, BCG-vaccinated control, T2DM, BCG-vaccinated T2DM, infected control, infected T2DM, infected BCG-vaccinated control and infected BCG-vaccinated T2DM mice were collected, and cytokine levels were measured in a multiplex ELISA. Experiments were performed two times and each time 2 to 3 mice per group were used. The data are shown as mean  $\pm$  SDs of  $n=5$  mice per group. The statistical analysis was performed by one-way ANOVA followed Tukey's multiple comparisons test. \*,  $p<0.05$ ; \*\*,  $p<0.01$  and \*\*\*,  $p<0.001$ .

Supplementary Figure 2

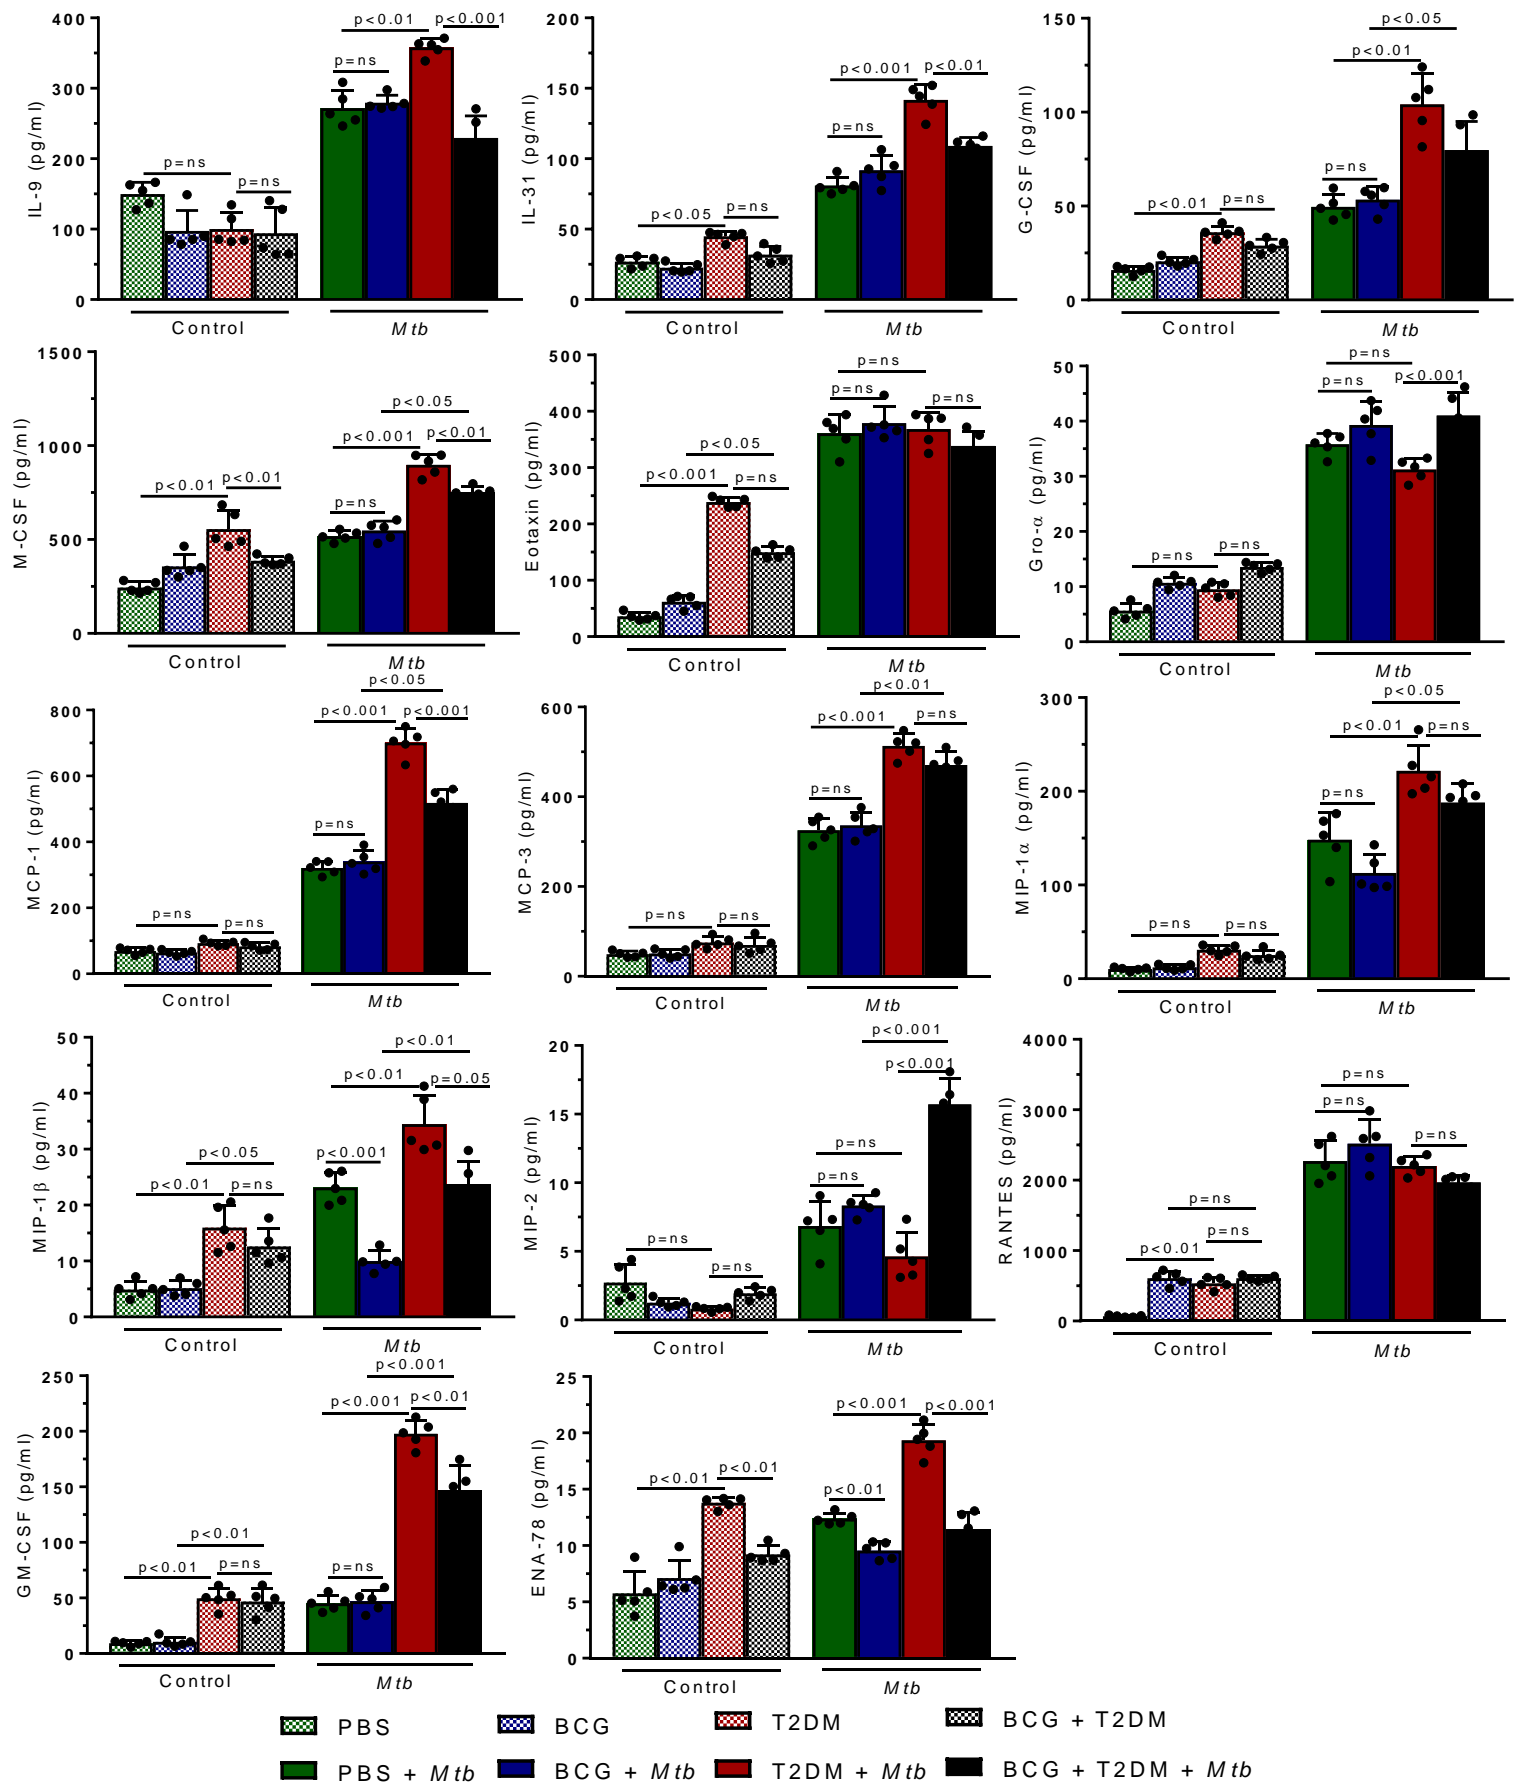

**Supplementary Fig. 2. BCG vaccination alters various cytokine and chemokine levels in T2DM mice infected with *Mtb* at four months p.i.**

PBS control, BCG-vaccinated, T2DM or BCG-vaccinated T2DM mice were infected with ~100 CFU of aerosolized *Mtb* H37Rv. A. At 4 months p.i., lung homogenates from PBS control, BCG-vaccinated control, T2DM, BCG-vaccinated T2DM, infected control, infected T2DM, infected BCG-vaccinated control and infected BCG-vaccinated T2DM mice were collected, and chemokine levels were measured in a multiplex ELISA. Experiments were performed two times and each time 2 to 3 mice per group were used. The data are shown as mean  $\pm$  SDs of  $n=5$  mice per group. The statistical analysis was performed by one-way ANOVA followed Tukey's multiple comparisons test. \*,  $p<0.05$ ; \*\*,  $p<0.01$  and \*\*\*,  $p<0.001$ .

## Supplementary Figure 3

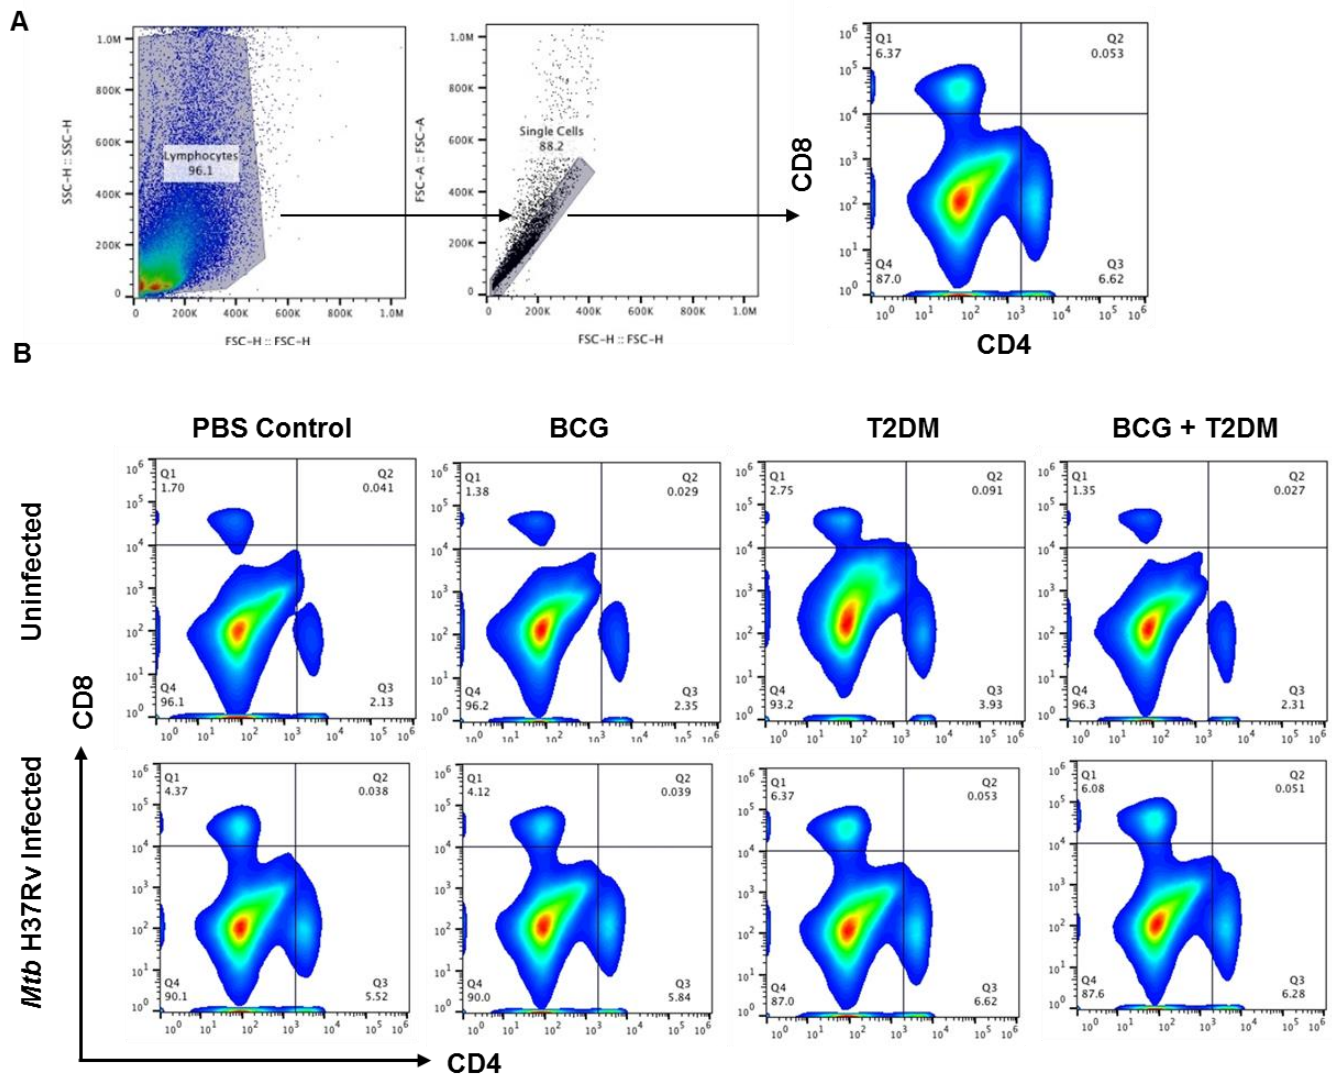

### Supplementary Fig. 3. Gating strategies to determine CD4+ and CD8+ cell populations in the lungs.

PBS control, BCG-vaccinated, T2DM or BCG-vaccinated T2DM mice were infected with ~100 CFU of aerosolized *Mtb* H37Rv. A. At one and 4 months p.i., the lungs from PBS control, BCG-vaccinated control, T2DM, BCG-vaccinated T2DM, infected control, infected T2DM, infected BCG-vaccinated control and infected BCG-vaccinated T2DM mice were isolated. Lung cells were prepared for flow cytometry as described in the methods sections. (A-B) Representative gating strategies for CD4+ and CD8+ cells are shown for four months p.i. Experiments were performed using  $n=5$  mice per group.

## Supplementary Figure 4

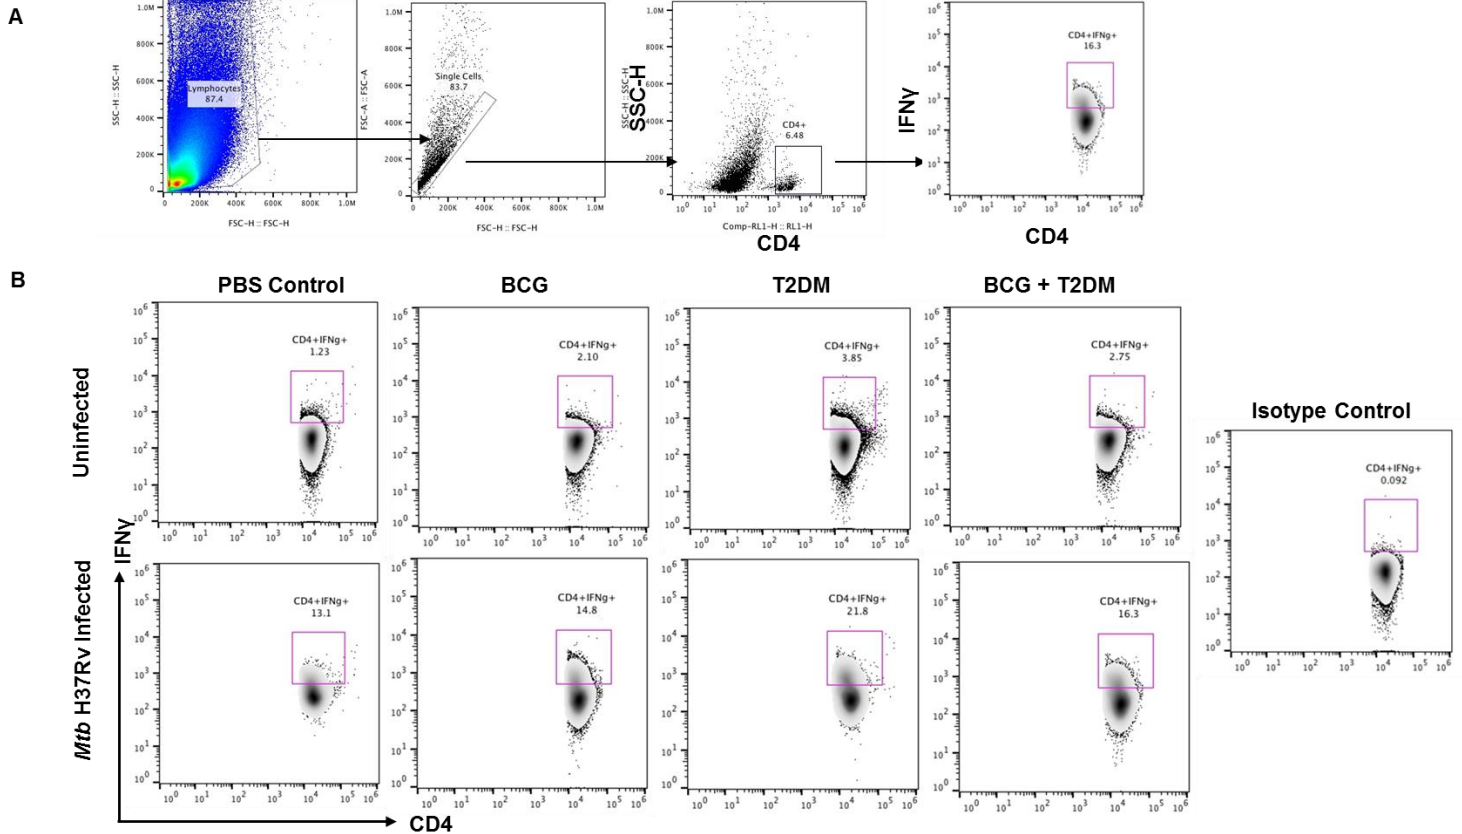

### Supplementary Fig. 4. Gating strategies to determine CD4+IFN- $\gamma$ + cells in the lungs.

PBS control, BCG-vaccinated, T2DM or BCG-vaccinated T2DM mice were infected with ~100 CFU of aerosolized *Mtb* H37Rv. A. At one and 4 months p.i., the lungs from PBS control, BCG-vaccinated control, T2DM, BCG-vaccinated T2DM, infected control, infected T2DM, infected BCG-vaccinated control and infected BCG-vaccinated T2DM mice were isolated. Lung cells were prepared for flow cytometry by surface staining followed by intracellular staining as described in the methods section. (A-B) Representative gating strategies for CD4+IFN- $\gamma$ + cells are shown for four months p.i. Experiments were performed using  $n=5$  mice per group.

## Supplementary Figure 5

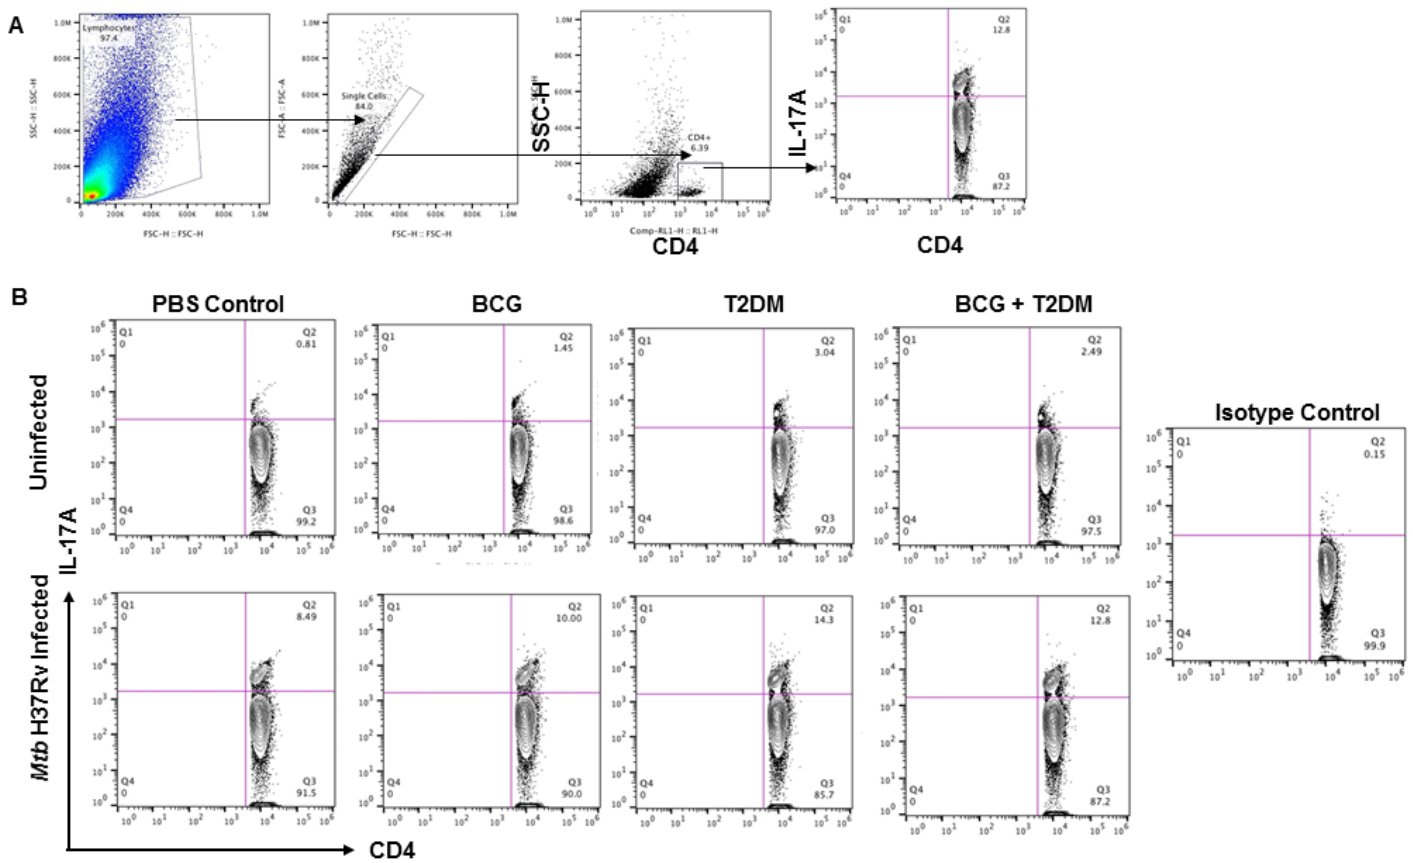

### Supplementary Fig. 5. Gating strategies to determine CD4+IL-17A+ cells in the lungs.

PBS control, BCG-vaccinated, T2DM or BCG-vaccinated T2DM mice were infected with ~100 CFU of aerosolized *Mtb* H37Rv. A. At one and 4 months p.i., the lungs from PBS control, BCG-vaccinated control, T2DM, BCG-vaccinated T2DM, infected control, infected T2DM, infected BCG-vaccinated control and infected BCG-vaccinated T2DM mice were isolated. Lung cells were prepared for flow cytometry by surface staining followed by intracellular staining of IL-17A+ cells. (A-B) Representative gating strategies for CD4+IL-17A+ cells are shown for four months p.i. Experiments were performed using  $n=5$  mice per group.



## Supplementary Figure 6

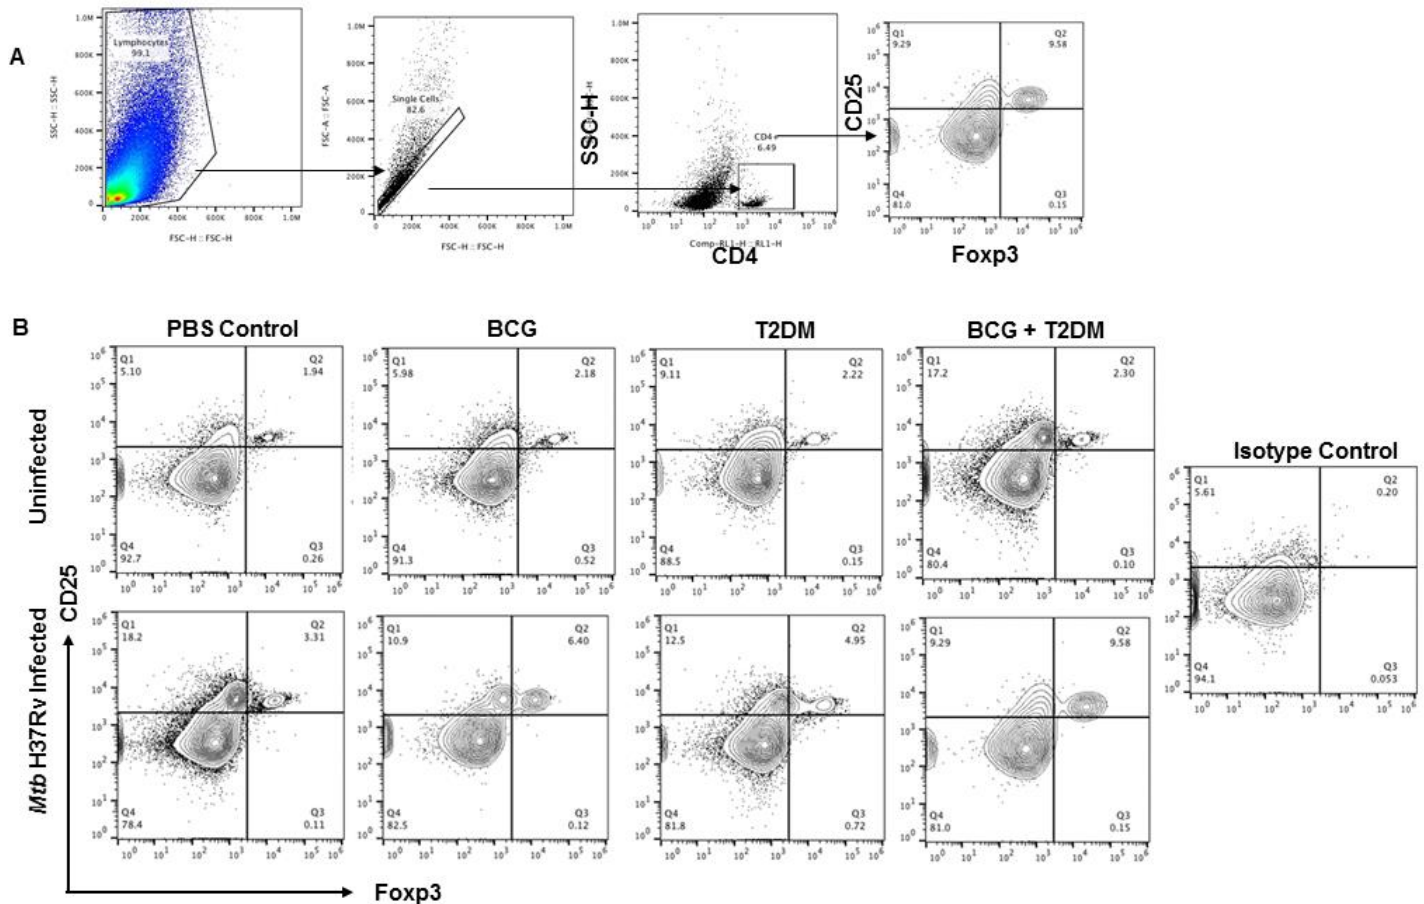

### Supplementary Fig. 6. Gating strategies to determine CD4+CD25+Foxp3+ T-regulatory cells in the lungs.

PBS control, BCG-vaccinated, T2DM or BCG-vaccinated T2DM mice were infected with ~100 CFU of aerosolized *Mtb* H37Rv. A. At one and 4 months p.i., the lungs from PBS control, BCG-vaccinated control, T2DM, BCG-vaccinated T2DM, infected control, infected T2DM, infected BCG-vaccinated control and infected BCG-vaccinated T2DM mice were isolated. Lung cells were prepared for flow cytometry by surface staining (CD4+CD25+) followed by intracellular staining of Foxp3+ cells. (A-B) Representative gating strategies for CD4+CD25+Foxp3+ cells are shown for four months p.i. Experiments were performed using  $n=5$  mice per group.



## Supplementary Figure 7

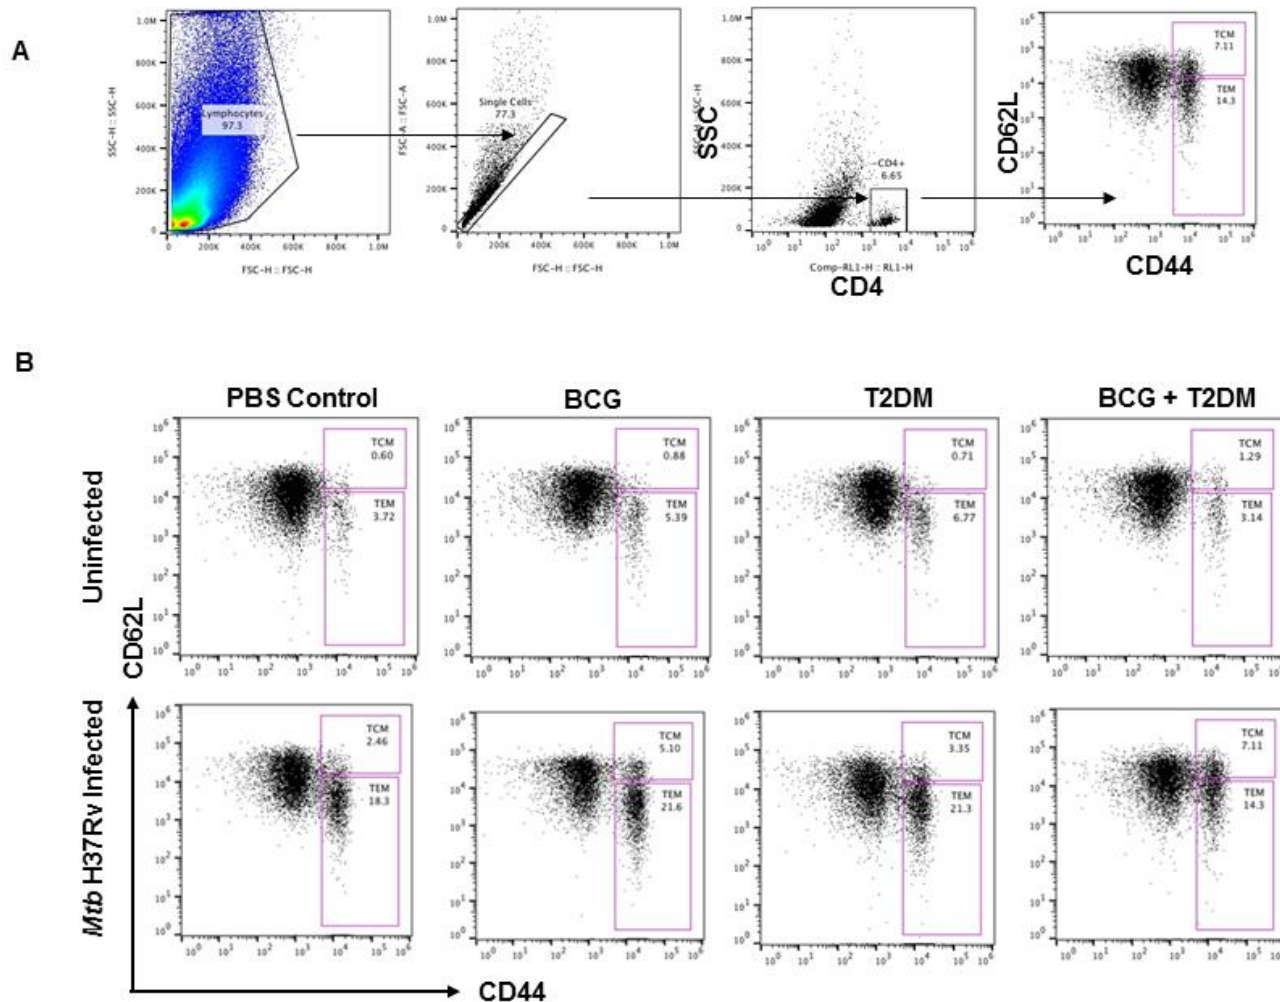

### Supplementary Fig. 7. Gating strategies to determine CD4+CD44+CD62L+ memory T cells in the lungs.

PBS control, BCG-vaccinated, T2DM or BCG-vaccinated T2DM mice were infected with ~100 CFU of aerosolized *Mtb* H37Rv. A. At one and 4 months p.i., the lungs from PBS control, BCG-vaccinated control, T2DM, BCG-vaccinated T2DM, infected control, infected T2DM, infected BCG-vaccinated control and infected BCG-vaccinated T2DM mice were isolated. Lung cells were prepared for flow cytometry as described in the methods sections. (A-B) Representative gating strategies for CD4+CD44+CD62L+ cells are shown for four months p.i. Experiments were performed using  $n=5$  mice per group.

## Supplementary Figure 8

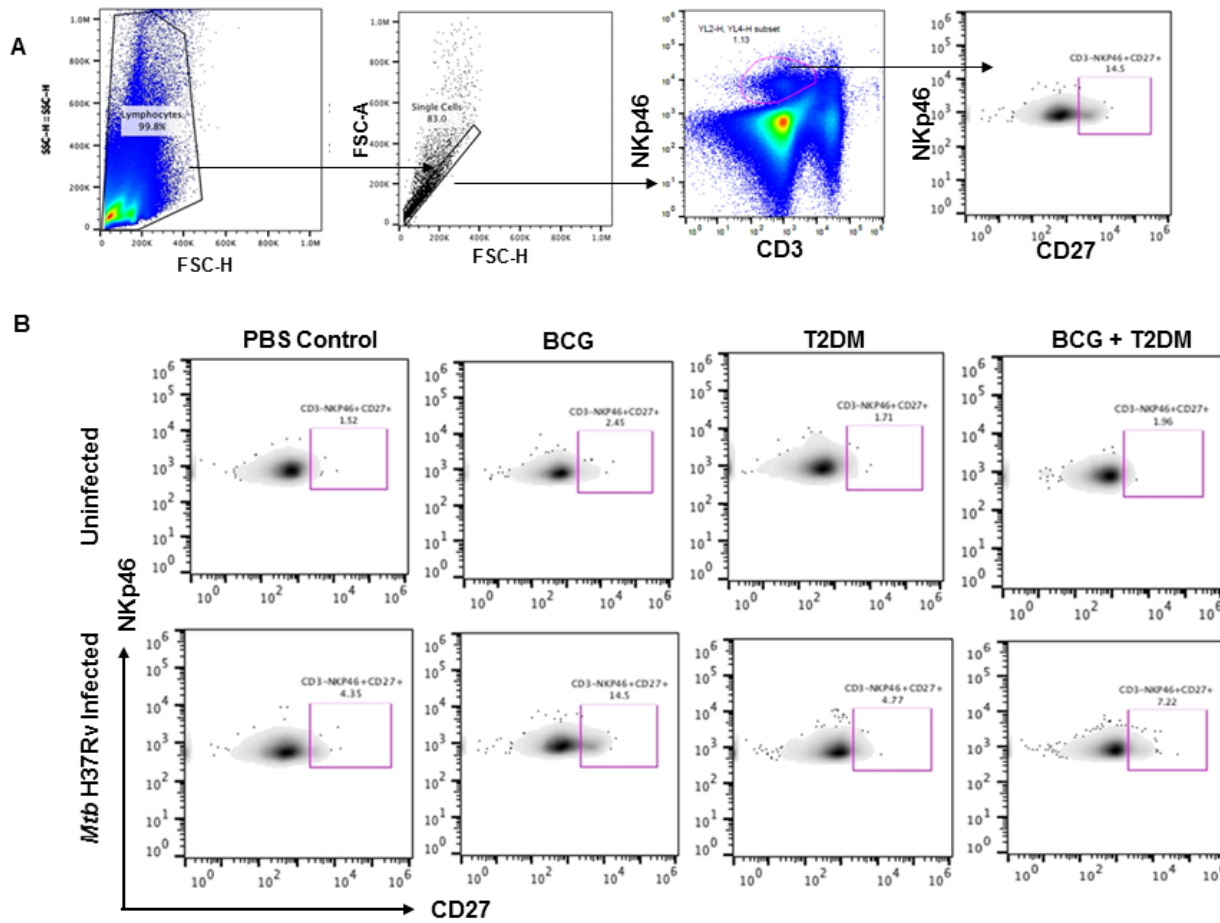

### Supplementary Fig. 8. Gating strategies to determine CD3-NKp46+CD27+ memory NK cells in the lungs.

PBS control, BCG-vaccinated, T2DM or BCG-vaccinated T2DM mice were infected with ~100 CFU of aerosolized *Mtb* H37Rv. A. At one and 4 months p.i., the lungs from PBS control, BCG-vaccinated control, T2DM, BCG-vaccinated T2DM, infected control, infected T2DM, infected BCG-vaccinated control and infected BCG-vaccinated T2DM mice were isolated. Lung cells were prepared for flow cytometry as described in the methods sections. (A-B) Representative gating strategies for CD3-NKp46+CD27+ memory NK cells are shown for four months p.i. Experiments were performed using  $n=5$  mice per group.

## Supplementary Figure 9

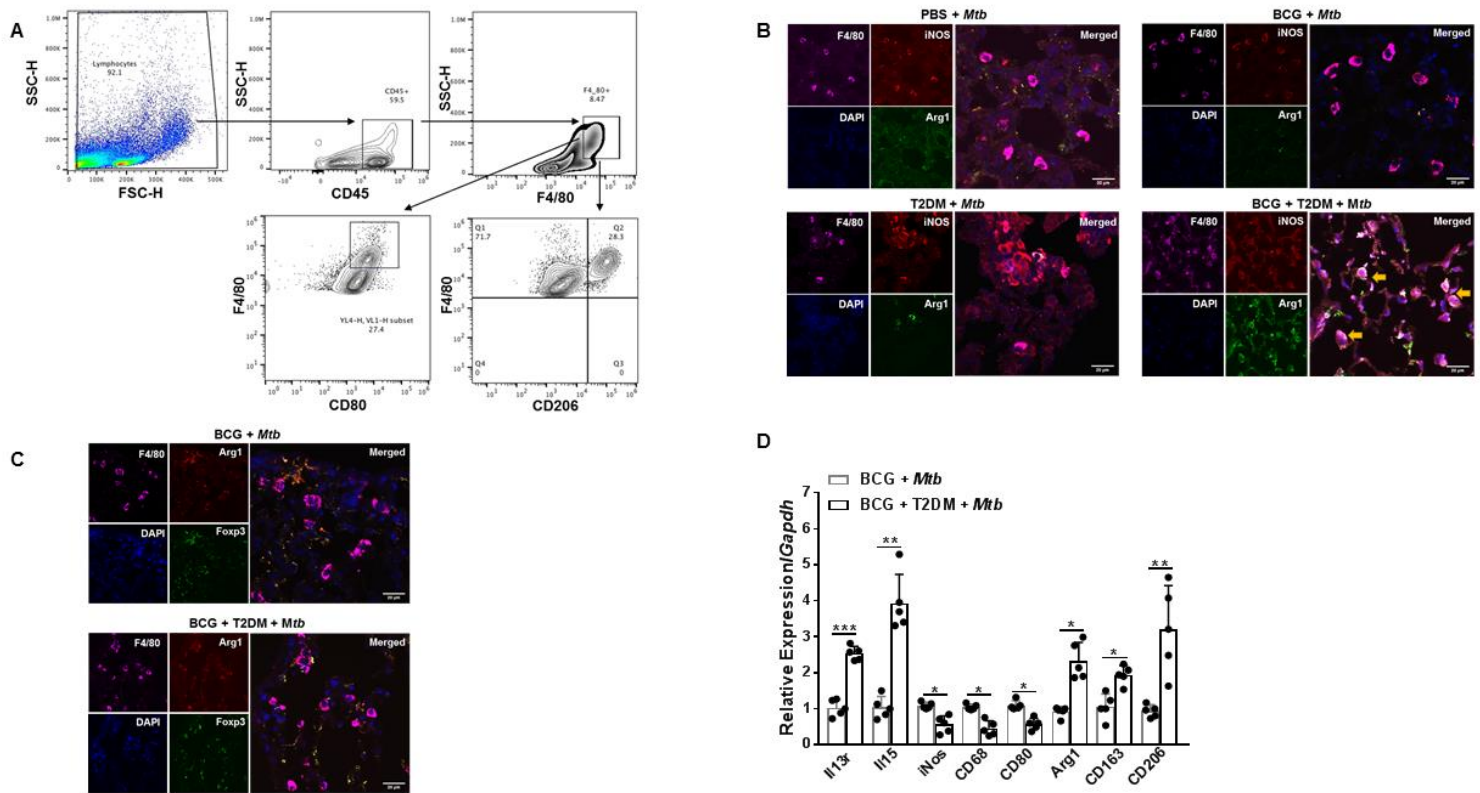

### Supplementary Fig. 9. BCG vaccination induces increased infiltration of T-regulatory cells and M2 macrophages in the lungs of *Mtb*-infected T2DM mice.

PBS control, BCG-vaccinated, T2DM or BCG-vaccinated T2DM mice were infected with ~100 CFU of aerosolized *Mtb* H37Rv. **A**. At one and 4 months p.i., the lungs from PBS control, BCG-vaccinated control, T2DM, BCG-vaccinated T2DM, infected control, infected T2DM, infected BCG-vaccinated control and infected BCG-vaccinated T2DM mice were isolated. Lung cells were prepared for flow cytometry as described in the methods sections. **(A)** Representative gating strategies for CD45<sup>+</sup>F4/80<sup>+</sup>CD80<sup>+</sup> cells or CD45<sup>+</sup>F4/80<sup>+</sup>CD206<sup>+</sup> cells are shown for four months p.i. At four-months post-infection (p.i.), lungs from infected control, infected T2DM, infected BCG-vaccinated control and infected BCG-vaccinated T2DM mice were isolated and formalin fixed. Paraffin-embedded tissue sections were prepared and analyzed by confocal microscopy for **(B)** F4/80+iNOS+Arg1<sup>+</sup> cells and **(C)** F4/80+Foxp3+Arg1<sup>+</sup> cells. Representative images of staining patterns were taken from multiple fields at 63X with oil immersion. Scale bar: 20  $\mu$ m. **(D)** At 4 months p.i., total RNA from the lungs of BCG-vaccinated nondiabetic and BCG-vaccinated T2DM mice infected with *Mtb* were isolated, and cDNA was prepared. Quantitative real-time PCR analysis shows *IL-13R*, *IL-15*, *iNOS*, *CD68*, *CD80*, *Arg1*, *CD163* and *CD206* gene expression. Experiments were performed two times and each time 2 to 3 mice per group were used. For statistical analysis unpaired t test (two tailed) was performed. The data are shown as mean  $\pm$  SDs of  $n=5$  mice per group. \*,  $p<0.05$ ; \*\*,  $p<0.01$  and \*\*\*,  $p<0.001$ .

## Supplementary Figure 10

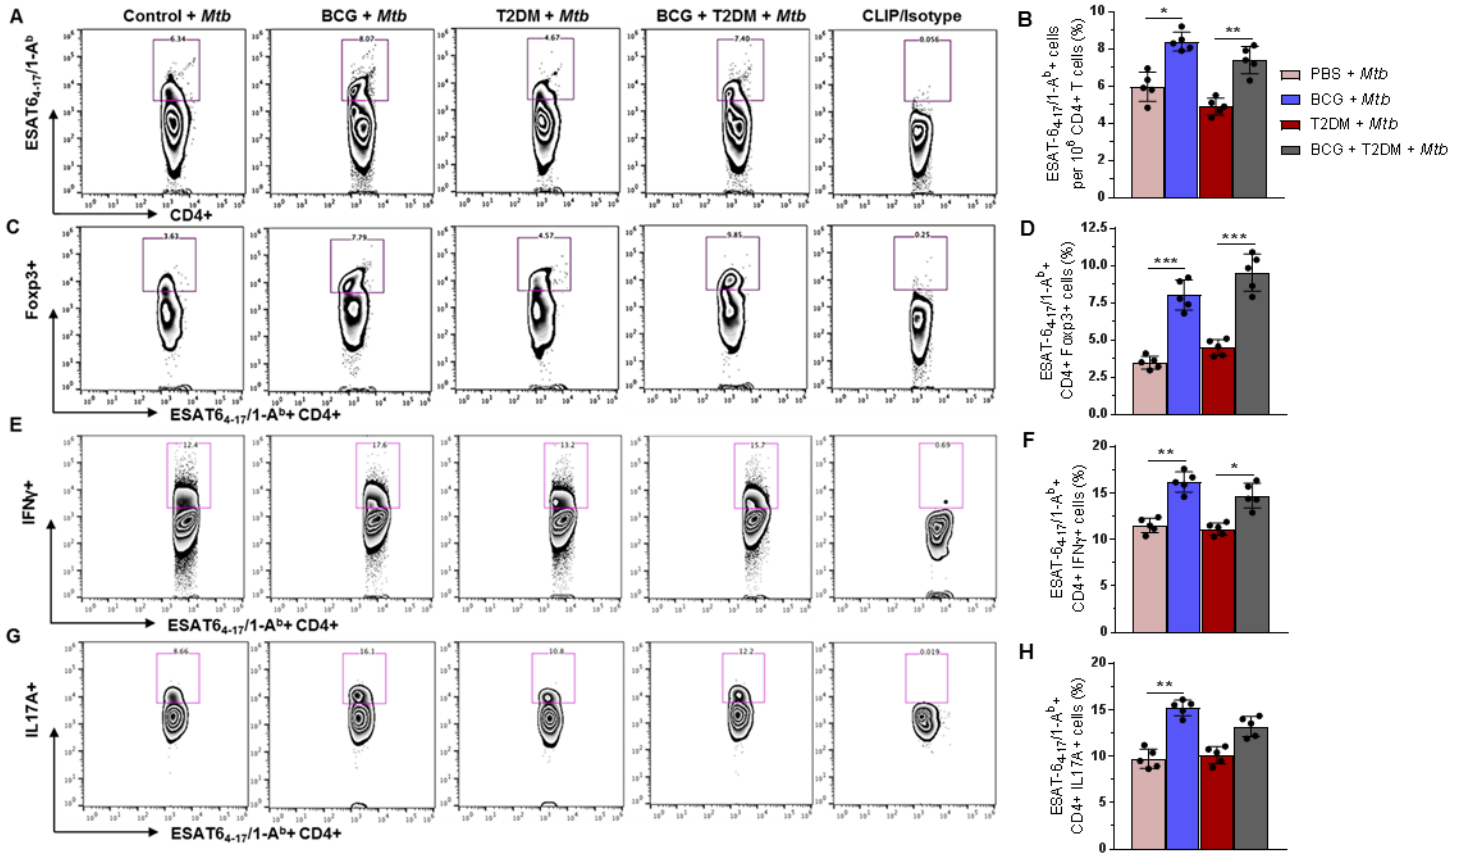

### Supplementary Fig. 10. Antigen-specific responses of BCG-vaccinated T2DM mice infected with *Mtb*.

PBS control, BCG-vaccinated, T2DM or BCG-vaccinated T2DM mice were infected with *Mtb* as described in Fig. 1. Four months after infection, lung cells were prepared as described in the methods section. **(A and B)** Percentage of tetramer<sup>+</sup> CD4<sup>+</sup> T cells in the lung and representative plots of ESAT-64-17/I-A<sup>b</sup>+ MHC II tetramer staining gated on CD4<sup>+</sup> T cells. **(C-D)** Percentage of tetramer<sup>+</sup> CD4<sup>+</sup> T and Fcγ3<sup>+</sup> cells in the lung and representative plots of Fcγ3 staining gated on tetramer<sup>+</sup> CD4<sup>+</sup> T cells. **(E-F)** Percentage of IFN-γ-producing tetramer<sup>+</sup> lung CD4<sup>+</sup> T cells and representative plots of IFN-γ staining gated on tetramer<sup>+</sup> lung CD4<sup>+</sup> T cells. **(G-H)** Percentage of IL-17A-producing tetramer<sup>+</sup> lung CD4<sup>+</sup> T cells and representative plots of IL-17A staining gated on tetramer<sup>+</sup> lung CD4<sup>+</sup> T cells. Experiments were performed two times and each time 2 to 3 mice per group were used. The data are shown as mean ± SDs of *n*=5 mice per group. The statistical analysis was performed by one-way ANOVA followed Tukey's multiple comparisons test. \*, *p*<0.05; \*\*, *p*<0.01 and \*\*\*, *p*<0.001.



## Supplementary Figure 11

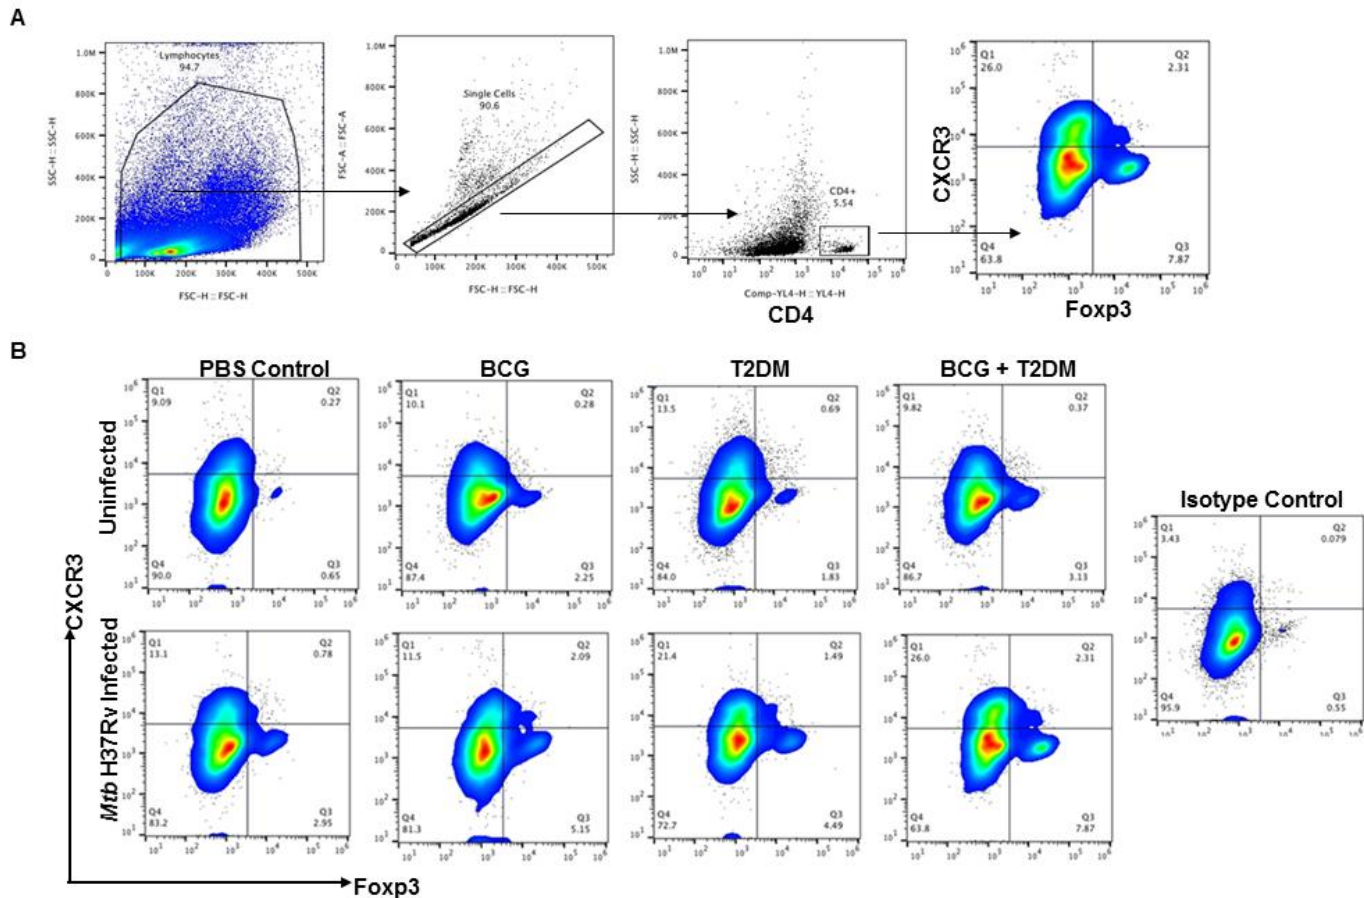

### Supplementary Fig. 11. Gating strategies to determine CD4+Foxp3+CXCR3+ T-regulatory cells in the lungs.

PBS control, BCG-vaccinated, T2DM or BCG-vaccinated T2DM mice were infected with ~100 CFU of aerosolized *Mtb* H37Rv. A. At 4 months p.i., the lungs from PBS control, BCG-vaccinated control, T2DM, BCG-vaccinated T2DM, infected control, infected T2DM, infected BCG-vaccinated control and infected BCG-vaccinated T2DM mice were isolated. Lung cells were prepared as described in the methods section. Lung cells were gated on CD4+Foxp3+CXCR3+ cells. (A-B) Representative gating strategies for CD4+Foxp3+CXCR3+ cells are shown. Experiments were performed using  $n=5$  mice per group.

Supplementary Figure 12

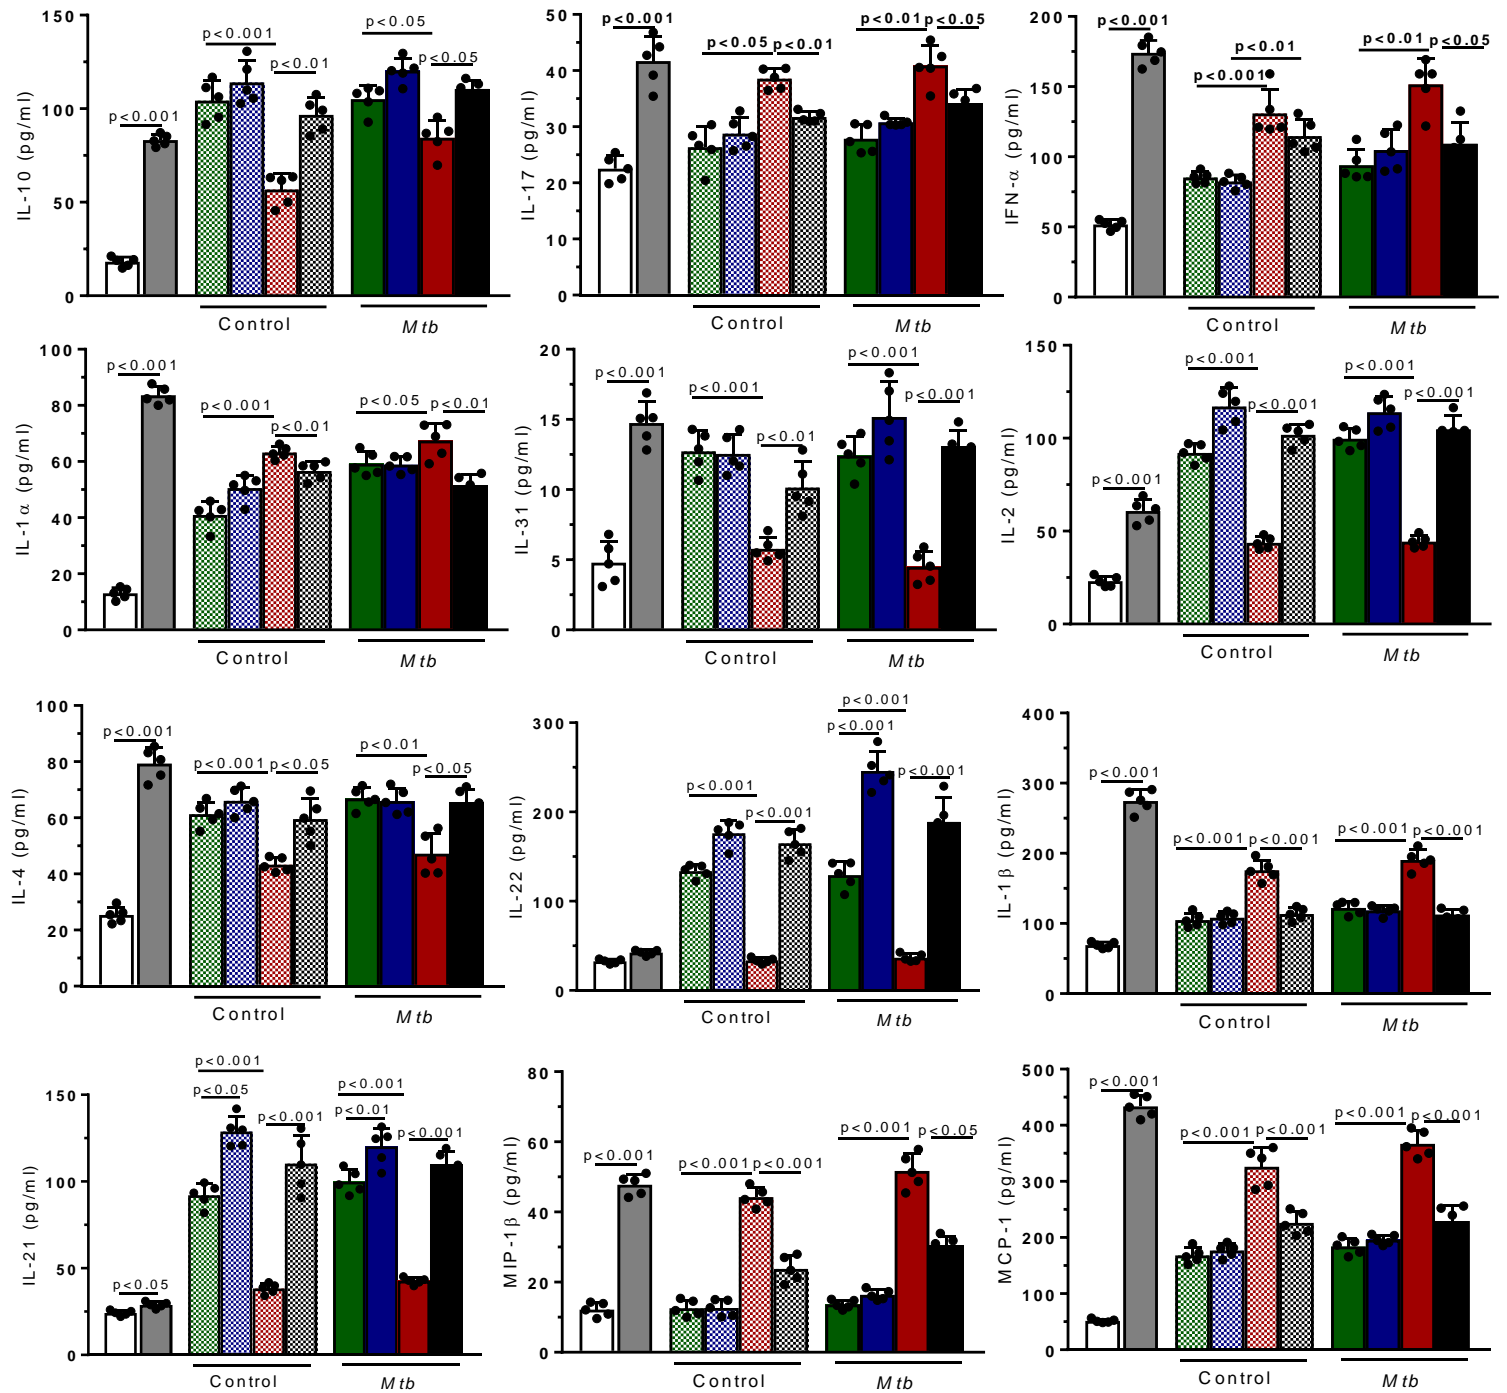

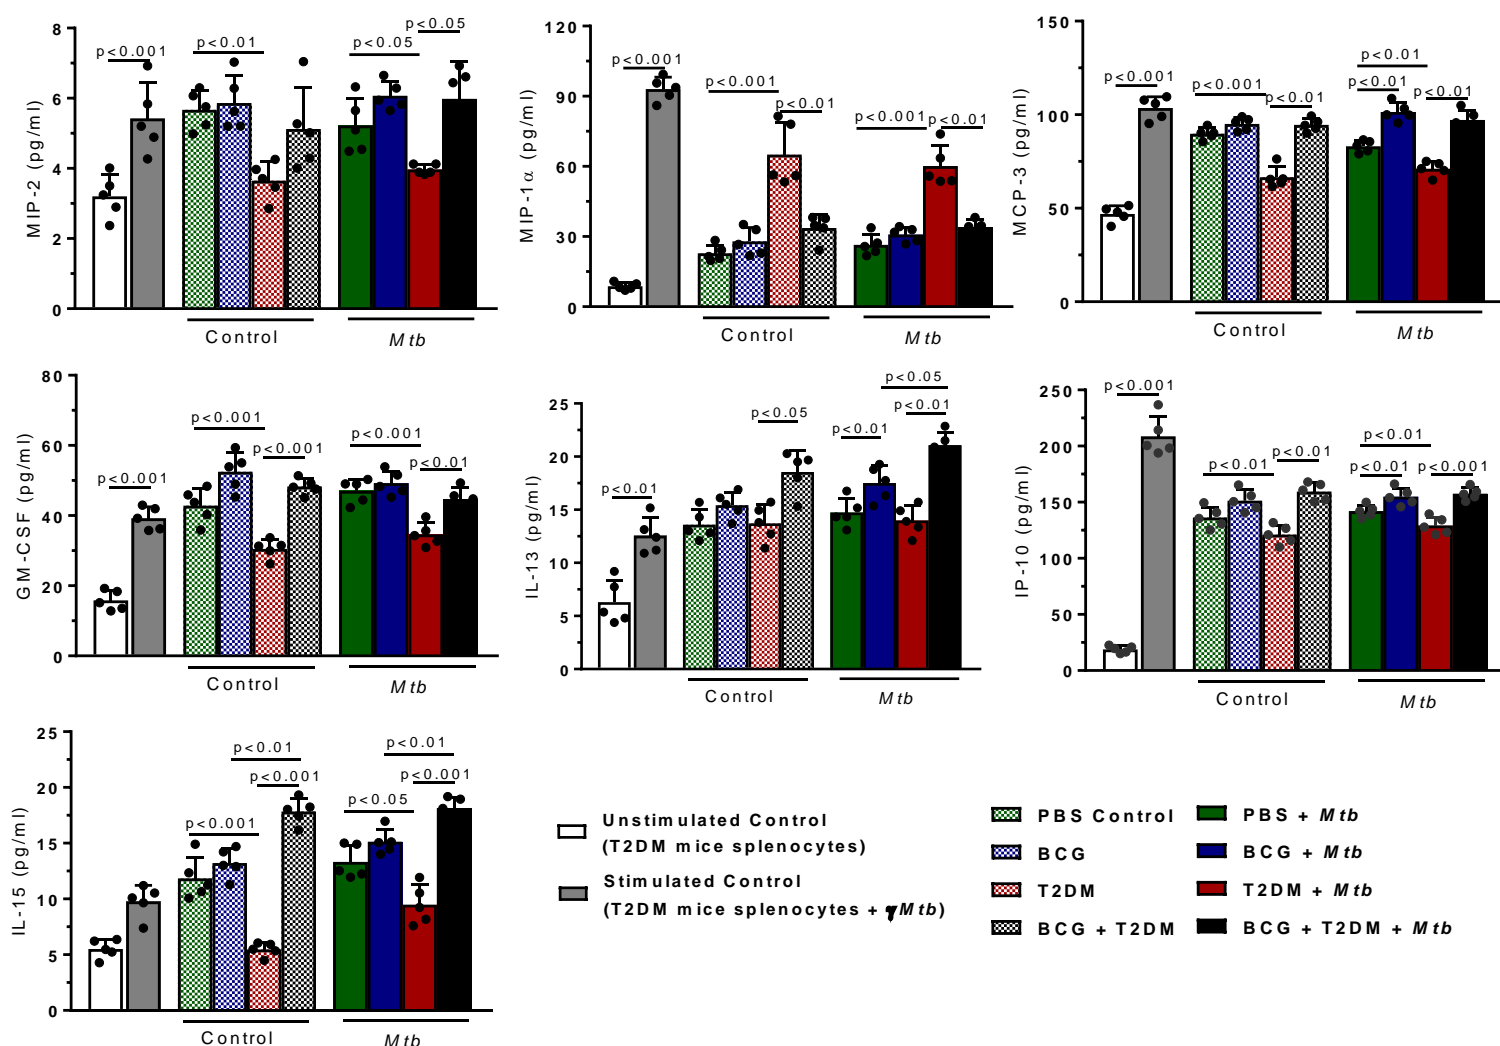

**Supplementary Fig. 12. T-regulatory cells from T2DM mice are less immunosuppressive.**

PBS control, BCG-vaccinated, T2DM or BCG-vaccinated T2DM mice were infected with ~100 CFU of aerosolized *Mtb* H37Rv. At 4 months p.i., T-regulatory cells were isolated from the lungs of PBS control, BCG-vaccinated control, T2DM, BCG-vaccinated T2DM, infected control, infected T2DM, infected BCG-vaccinated control and infected BCG-vaccinated T2DM mice. T-regulatory cell-depleted splenocytes were isolated from *Mtb*-infected T2DM mice, labeled with CFSE and cultured with  $\gamma$ -irradiated *Mtb* H37Rv (10  $\mu$ g/ml) in the presence of T-regulatory cells from all the above groups of mice at a 1:1 ratio. After 72 h, supernatants were collected, and cytokines and chemokine levels were measured in a multiplex ELISA. Experiments were performed two times and each time 2 to 3 mice per group were used. The data are shown as mean  $\pm$  SDs of  $n=5$  mice per group. The statistical analysis was performed by one-way ANOVA followed Tukey's multiple comparisons test. \*,  $p<0.05$ ; \*\*,  $p<0.01$  and \*\*\*,  $p<0.001$ .



## Supplementary Figure 13

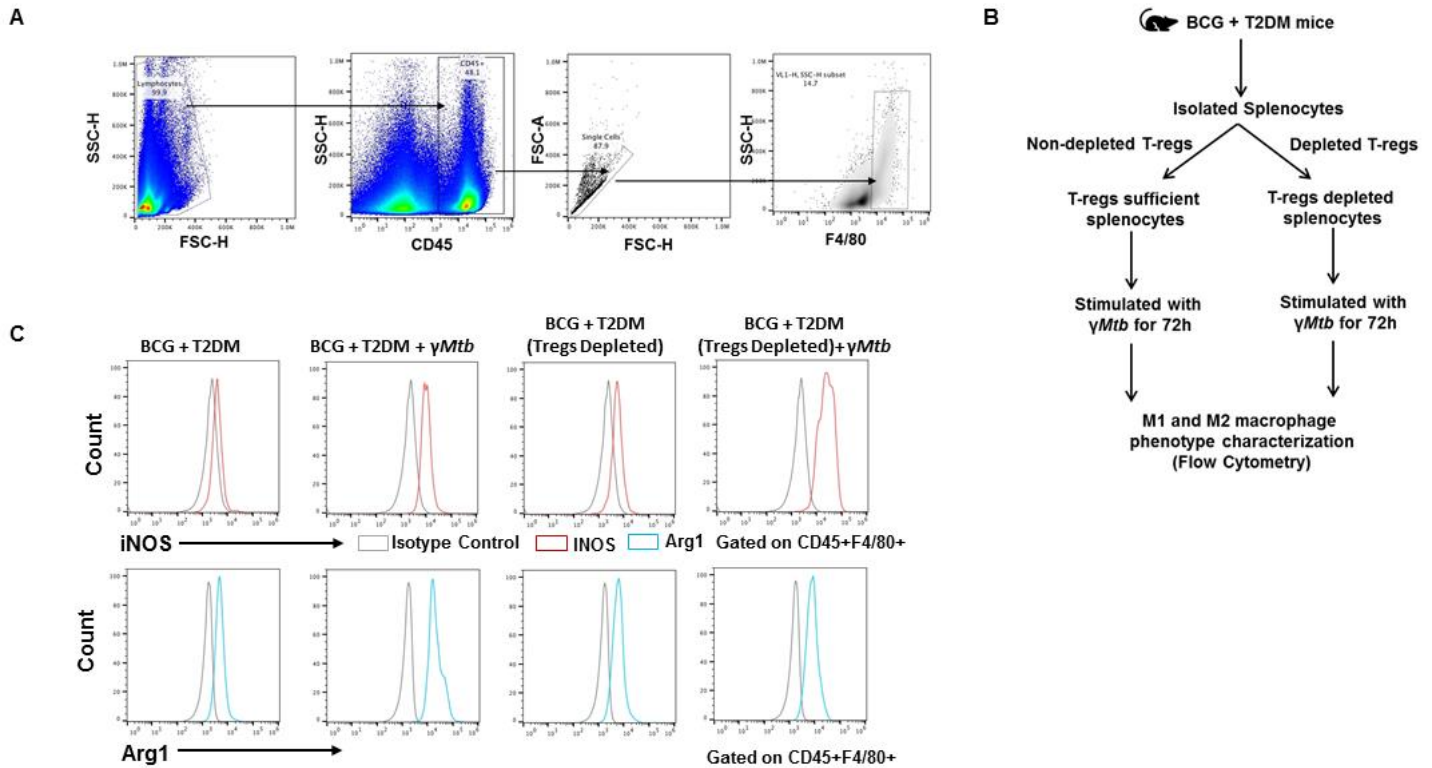

### Supplementary Fig. 13. Gating strategies for CD45+F4/80+iNOS+ or Arg1+ cells.

BCG-vaccinated or BCG-vaccinated T2DM mouse lungs or splenocytes were isolated. Cells were prepared as described in the methods section and stained for CD45+F4/80+iNOS+ or CD45+F4/80+Arg1+ cells. **(A)** A representative gating strategy is shown. **(B)** A schematic representation of the isolation of splenocytes from BCG-vaccinated T2DM mice, depletion of T-regulatory cells and stimulation with  $\gamma$ -irradiated *Mtb* is shown. **(C)** BCG-vaccinated T2DM mouse splenocytes were isolated and cultured in 12-well plates at  $1 \times 10^6$  cells/well in RPMI-1640 containing penicillin (Life Technologies) and 10% heat-inactivated FCS, with or without  $\gamma$ -irradiated *Mtb* (10  $\mu$ g/ml) at 37°C and 5% CO<sub>2</sub>. In some wells, T reg-depleted splenocytes were stimulated with  $\gamma$ -irradiated *Mtb* (10  $\mu$ g/ml). After 72 h, the cells were collected and phenotypically characterized for M1/M2 macrophages. Experiments were performed using  $n=5$  mice per group.

## Supplementary Figure 14

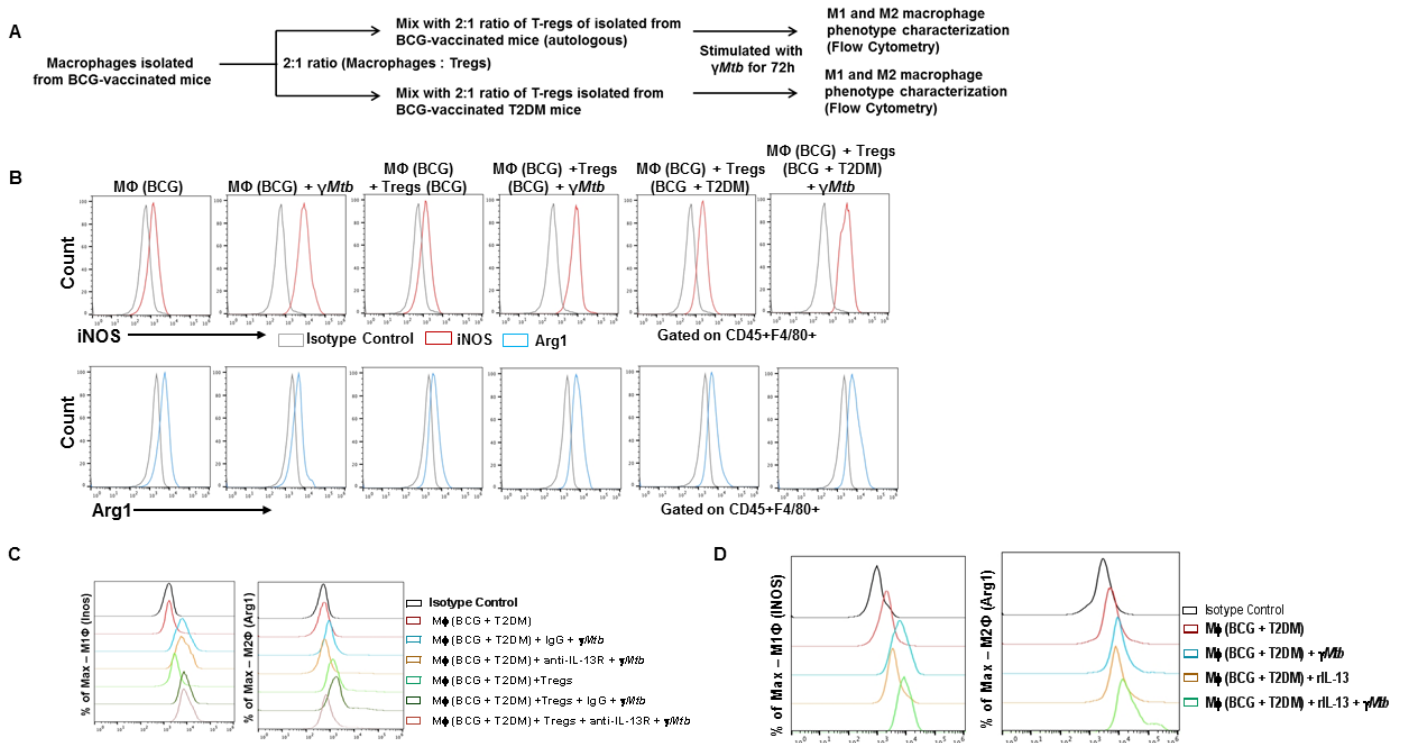

### Supplementary Fig. 14. *T-regulatory cells from BCG-vaccinated T2DM mice suppress inflammation through IL-13R signaling.*

**(A)** Macrophages isolated from BCG-vaccinated mice were cocultured with autologous T-regulatory cells or T-regulatory cells isolated from BCG-vaccinated T2DM mice and stimulated with  $\gamma$ -irradiated *Mtb* (10  $\mu$ g/ml). After 72 h of incubation, the macrophages were analyzed for M1 and M2 phenotypes by flow cytometry. **(B)** Representative histogram showing the CD45+F4/80+iNos<sup>+</sup> cells and CD45+F4/80+Arg1<sup>+</sup> cells. **(C)** For neutralization studies, BCG-vaccinated T2DM mouse macrophages were stimulated with  $\gamma$ -irradiated *Mtb* (10  $\mu$ g/ml) with or without autologous T-regulatory cells, and in some wells, IgG control or IL-13R (10  $\mu$ g/ml) antibodies were added. After 72 h of incubation, the M1 and M2 phenotypes of cultured macrophages were determined by flow cytometry. **(C)** Recombinant IL-13 (10 ng/ml) was added to the macrophages from BCG-vaccinated T2DM mice and stimulated with  $\gamma$ -irradiated *Mtb* (10  $\mu$ g/ml). After 72 h of incubation, the M1 and M2 phenotypes of cultured macrophages were determined by flow cytometry, and representative histogram plots for CD45+F4/80+iNos<sup>+</sup> cells and CD45+F4/80+Arg1<sup>+</sup> cells are shown. Experiments were performed using  $n=5$  mice per group.

**Supplemental Table 1: Leukocyte populations in the lungs of control and *Mtb*-infected mice.**

|                   | Months | PBS Control  | BCG          | T2DM         | BCG + T2DM   | PBS + <i>Mtb</i> | BCG + <i>Mtb</i> | T2DM + <i>Mtb</i> | BCG + T2DM + <i>Mtb</i> |
|-------------------|--------|--------------|--------------|--------------|--------------|------------------|------------------|-------------------|-------------------------|
| CD3+ Cells        | 1      | 21850 ± 305  | 24998 ± 1547 | 28949 ± 495  | 36149 ± 275  | 96301 ± 6144     | 117244 ± 3681    | 146425 ± 6251     | 182733 ± 3484 @#        |
|                   | 4      | 25171 ± 296  | 26202 ± 554  | 25081 ± 401  | 24718 ± 769  | 87711 ± 2535     | 106926 ± 2329    | 121147 ± 2424     | 110609 ± 5045 *@        |
| CD4+ Cells        | 1      | 11422 ± 480  | 11835 ± 435  | 15515 ± 680  | 18392 ± 543  | 34461 ± 1531     | 50158 ± 1662     | 85198 ± 4665      | 92424 ± 2349 *@#        |
|                   | 4      | 16388 ± 575  | 17094 ± 545  | 32078 ± 682  | 23599 ± 1364 | 45577 ± 1591     | 48213 ± 1023     | 66198 ± 1379      | 53660 ± 1073 *@         |
| Ly6G+ Neutrophils | 1      | 2450 ± 74    | 2778 ± 135   | 6717 ± 120   | 9877 ± 435   | 102527 ± 6473    | 98521 ± 1491     | 86414 ± 992       | 91860 ± 1615            |
|                   | 4      | 2029 ± 102   | 2250 ± 64    | 5609 ± 312   | 4389 ± 65    | 58527 ± 1059     | 60021 ± 2003     | 79425 ± 2060      | 66360 ± 2386 @\$        |
| CD3-NK1.1+        | 1      | 907 ± 28     | 1171 ± 29    | 902 ± 17     | 1127 ± 79    | 3438 ± 126       | 7701 ± 157       | 3510 ± 62         | 5279 ± 347 *#\$         |
|                   | 4      | 611 ± 13     | 1027 ± 70    | 789 ± 64     | 910 ± 53     | 3286 ± 101       | 7167 ± 117       | 3779 ± 218        | 5622 ± 290 *@#\$        |
| CD11b+            | 1      | 8514 ± 499   | 9072 ± 61    | 10679 ± 339  | 11019 ± 427  | 16609 ± 912      | 18370 ± 1012     | 20901 ± 901       | 27101 ± 1009 @#\$       |
|                   | 4      | 9766 ± 1751  | 10486 ± 568  | 13185 ± 1161 | 12294 ± 1060 | 16136 ± 1588     | 19889 ± 1435     | 22096 ± 2072      | 21022 ± 2325 *@         |
| CD11c+            | 1      | 10027 ± 135  | 10782 ± 395  | 11907 ± 611  | 15037 ± 321  | 60520 ± 1679     | 69302 ± 1109     | 76819 ± 1600      | 81099 ± 1091 *@#\$      |
|                   | 4      | 11110 ± 1865 | 11966 ± 1402 | 12465 ± 889  | 12514 ± 1838 | 54806 ± 1321     | 64848 ± 4694     | 91347 ± 5841      | 73174 ± 3150 *@#\$      |
| CD11c+F4/80+      | 1      | 3591 ± 31    | 3552 ± 301   | 5460 ± 221   | 5581 ± 37    | 8757 ± 484       | 9519 ± 79        | 15090 ± 509       | 14031 ± 429 @#\$        |
|                   | 4      | 3214 ± 150   | 3276 ± 158   | 5213 ± 174   | 4538 ± 76    | 7530 ± 315       | 8236 ± 220       | 12941 ± 2414      | 11056 ± 2091 @          |
| B220+Igm+         | 1      | 13066 ± 491  | 14343 ± 1109 | 16975 ± 765  | 17663 ± 620  | 19248 ± 524      | 22912 ± 1400     | 21057 ± 966       | 21488 ± 1605 *          |
|                   | 4      | 11873 ± 659  | 13626 ± 552  | 17982 ± 544  | 15357 ± 325  | 17076 ± 391      | 20481 ± 879      | 20684 ± 1715      | 20465 ± 767 *@          |

**Supplementary Table 1. Leukocyte populations in the lungs of control and *Mtb*-infected mice.**

PBS control, BCG-vaccinated, T2DM or BCG-vaccinated T2DM mice were infected with ~100 CFU of aerosolized *Mtb* H37Rv. A. At one and 4 months p.i., the lungs from PBS control, BCG-vaccinated control, T2DM, BCG-vaccinated T2DM, infected control, infected T2DM, infected BCG-vaccinated control and infected BCG-vaccinated T2DM mice were isolated. The absolute numbers and frequencies of various leukocytes per 10<sup>6</sup> total lung cell populations were determined by flow cytometry. Experiments were performed two times and each time 2 to 3 mice per group were used. The data are shown as mean ± SEM of *n*=5 mice per group. Statistical analysis was performed by one-way ANOVA followed Tukey's multiple comparisons test with, *p*<0.05 was considered significant. Comparisons between the groups as follows,

\* PBS + *Mtb* vs. BCG + *Mtb*;

@ PBS + *Mtb* vs. T2DM + *Mtb*;

# BCG + *Mtb* vs. BCG + T2DM + *Mtb*;

\$ T2DM + *Mtb* vs. BCG+ T2DM + *Mtb*.

**Supplemental Table 2. List of primers used for the qRT-PCR analysis in this study**

| Gene Name       | Mouse Primer Sequences (5'...3') |                        |
|-----------------|----------------------------------|------------------------|
|                 | Forward                          | Reverse                |
| <i>Bcl2</i>     | CATGTGTGTGGAGAGCGTCA             | GCATGCTGGGGCCATATAGT   |
| <i>klrg1</i>    | ACATTTCCGGACAACCAGGG             | TGTTCTCAAGCCGATCCAG    |
| <i>Itgae</i>    | GAGCAAAACCAAGCCTCAGC             | AGGAGAAACAGTCGGAAGGAAA |
| <i>Stat3</i>    | CGTGGAGCTGTTCAAGAACTT            | AACTGGACACCAGTCTTGATGA |
| <i>Tbet</i>     | TCAACCAGCACCAGACAGAG             | AAACATCCTGTAATGGCTTGTG |
| <i>Roryt</i>    | TTCACCCACCTCCACTG                | TGCAAGGGATCACTTCAATTT  |
| <i>Irf4</i>     | ACCCCATGACAGCACCTTAT             | GGGTGGCATCATGTAGTTATGA |
| <i>Gata3</i>    | CATTACCACCTATCCGCCCTATG          | CACACACTCCCTGCCTTCTGT  |
| <i>Tnfrsf18</i> | GTTTGGCTTCCGGTGTGTTG             | TTCTCTGGTGGTCACTGCAA   |
| <i>Gzmb</i>     | GAAGCCAGGAGATGTGTGCT             | GCACGTTTGGTCTTTGGGTC   |
| <i>Il10</i>     | GCTCTTGCACTACCAAAGCC             | CTGCTGATCCTCATGCCAGT   |
| <i>Lag3</i>     | TGGCTGAAAAGAGTGGAAT              | TGCTACAGGTGTAGGTCCCA   |
| <i>Tgfb1</i>    | CATGGAGCTGGTGAAACGGA             | GGCGAGCCTTAGTTTGGACA   |
| <i>Ctla4</i>    | ATCCTGGAAACAACTGGATCA            | TGGGCTTCAGATAACGGCTG   |
| <i>Pd1</i>      | CAGACTGAAAAACAGGCCGC             | GTATGATCTGGAAGCGGGCA   |
| <i>Bcl6</i>     | GAACCACGATCCGCACTAT              | CGTGCCGGGTAACTGGATA    |
| <i>Foxp3</i>    | AGAGGTATTGAGGGTGGGTGT            | TTTCTTCTGTCTGGAGTGGC   |
| <i>Cxcr3</i>    | GCAACTGTGGTCGAGAAAGC             | GGCATAGAGCAGCGGATTGA   |
| <i>Il18</i>     | GCCTCAAACCTTCCAAATCA             | TGGATCCATTTCTCAAAGG    |
| <i>Il13</i>     | CCTGGCTCTTGCTTGCCTT              | GGTCTTGTGTGATGTTGCTCA  |
| <i>Cxcr5</i>    | ACTGGCCTTCTACAGTAACAGC           | CAGCACCAGGATGTTTCCCA   |
| <i>Cxcr6</i>    | GAGTGGGTCTTTGGCACAGT             | CGATCCACTGTGATGCAGGT   |
| <i>Il2ra</i>    | AACACCACCGATTCTGGCT              | CGTTAGGTGAATGCTTGGCG   |
| <i>Tnfrsf1b</i> | GCATCTGTAGCATCCTGGCT             | GTGGGCTCTGGCTGAGATAC   |

|                                |                           |                          |
|--------------------------------|---------------------------|--------------------------|
| <i>Ccr7</i>                    | TGTGATTTCTACAGCCCCCAG     | TGACAAGGAGAGCCACCACC     |
| <i>Ido</i>                     | GATGCTGGGACATTCCTTCAGT    | GAACATCGTCATCCCCTCGG     |
| <i>Tnfrsf9</i>                 | TGGTGAGCTTCTCTCCCAGTA     | TAAGGACCTGCAAGGAGTGC     |
| <i>Ox40</i>                    | ACAAGTGCTGTCGTGAGTGC      | CAAGGTGGGTGGAGAGGGCAA    |
| <i>Il13r</i>                   | GAATTTGAGCGTCTCTGTCGAA    | GGTTATGCCAAATGCACTTGAG   |
| <i>Il15</i>                    | CTCTGTTGACAAGCAATGAGACG   | TCTTCAGTATGTCTAGCCCCTG   |
| <i>Inos</i>                    | GCAGAAATGTGACCATCATGG     | ACAACCTTGGTGTTGAAGGC     |
| <i>Arg1</i>                    | GGAATCTGCATGGGCAACCTGTGT  | AGGGTCTACGTCTCGCAAGCCA   |
| <i>CD68</i>                    | TTGCTAGGACCGCTTATAG       | AAGGATGGCAGGAGAGTA       |
| <i>CD163</i>                   | AAGCATTACTGTCATCATAG      | CTCCACCTACAAGTCTAA       |
| <i>CD206</i>                   | ATCCACTCTATCCACCTTCA      | TGCTTGTTCATATCTGTCTTCA   |
| <i>F4/80</i>                   | AAGCATCCGAGACACACACAGTCT  | TGACTGTACCCACATGGCTGATGA |
| <i>CD80</i>                    | CTAGTTTCTCTTTTTCAGGTTGTGA | GTATGTGCCCCGGTCTGAAA     |
| <i>Gapdh</i>                   | AGGTCGGTGAACGGATTTG       | TGTAGACCATGTAGTTGAGGTCA  |
| <i><math>\beta</math>actin</i> | TTACAGGAAGTCCCTCACCC      | ACACAGAAGCAATGCTGTCAC    |
